# Supplementary material for: RIPK1 in Liver Parenchymal Cells Limits Murine Hepatitis during Acute CCl4-Induced Liver Injury
Source: MDPI journal article supplement (doi:10.3390/ijms23137367), 2022-07-01
Supplement: s1 [file s1]

**Figure S1**

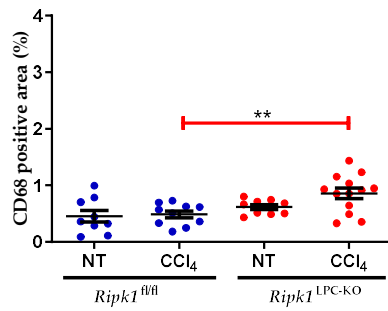

**Figure S1: Macrophage infiltration analysis in non-treated and CCl<sub>4</sub>-treated *Ripk1<sup>fl/fl</sup>* and *Ripk1<sup>LPC-KO</sup>* mice.** *Ripk1<sup>fl/fl</sup>* and *Ripk1<sup>LPC-KO</sup>* mice were force-fed either with olive oil alone (control; NT for non-treated) or containing CCl<sub>4</sub> (dose of 2.4 g/kg body weight), 24 h before sample collection. Signal quantification of anti-CD68 positive area. For the graph, each dot represents an individual and errors bars are expressed as means ± SEM (\*\* p < 0.01).

# Figure S2

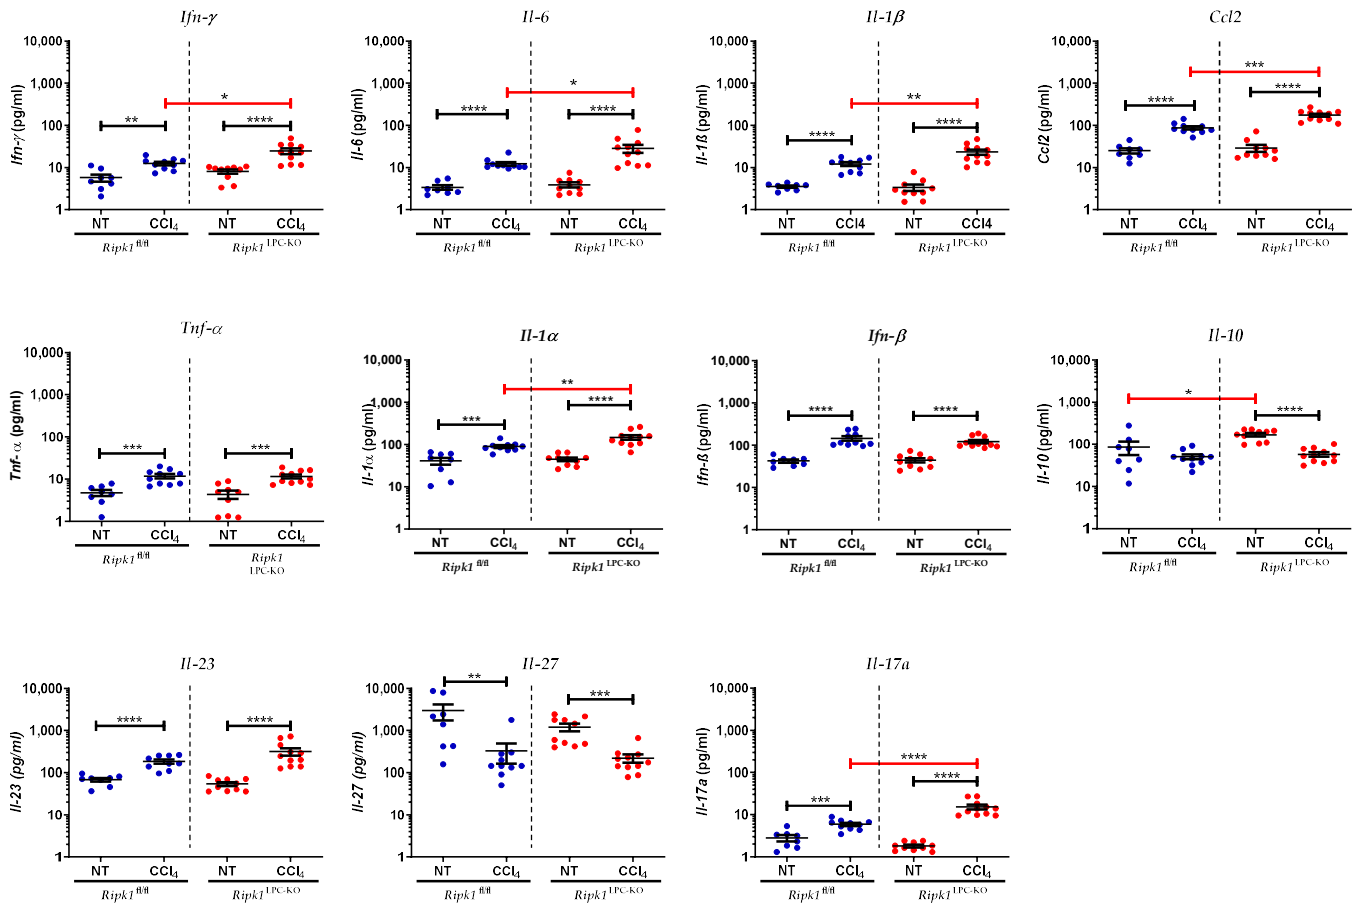

**Figure S2: Serum levels of cytokines in non-treated and CCl<sub>4</sub>-treated *Ripk1<sup>fl/fl</sup>* and *Ripk1<sup>LPC-KO</sup>* mice.** *Ripk1<sup>fl/fl</sup>* and *Ripk1<sup>LPC-KO</sup>* mice were force-fed either with olive oil alone (control; NT for non-treated) or containing CCl<sub>4</sub> (dose of 2.4 g/kg body weight), 24 h before serum collection. Murine cytokines were captured by a bead-based immunoassay (BioLegend's LEGENDplex™ Mouse Inflammation Panel, multi-analyte flow assay kit) and quantified on a LSR X-20 Fortessa™ flow cytometer (BD Biosciences). For all graphs, each dot represents an individual and errors bars are expressed as means ± SEM (\* p < 0.05; \*\* p < 0.01; \*\*\* p < 0.001 and \*\*\*\* p < 0.0001).

**Figure S3**

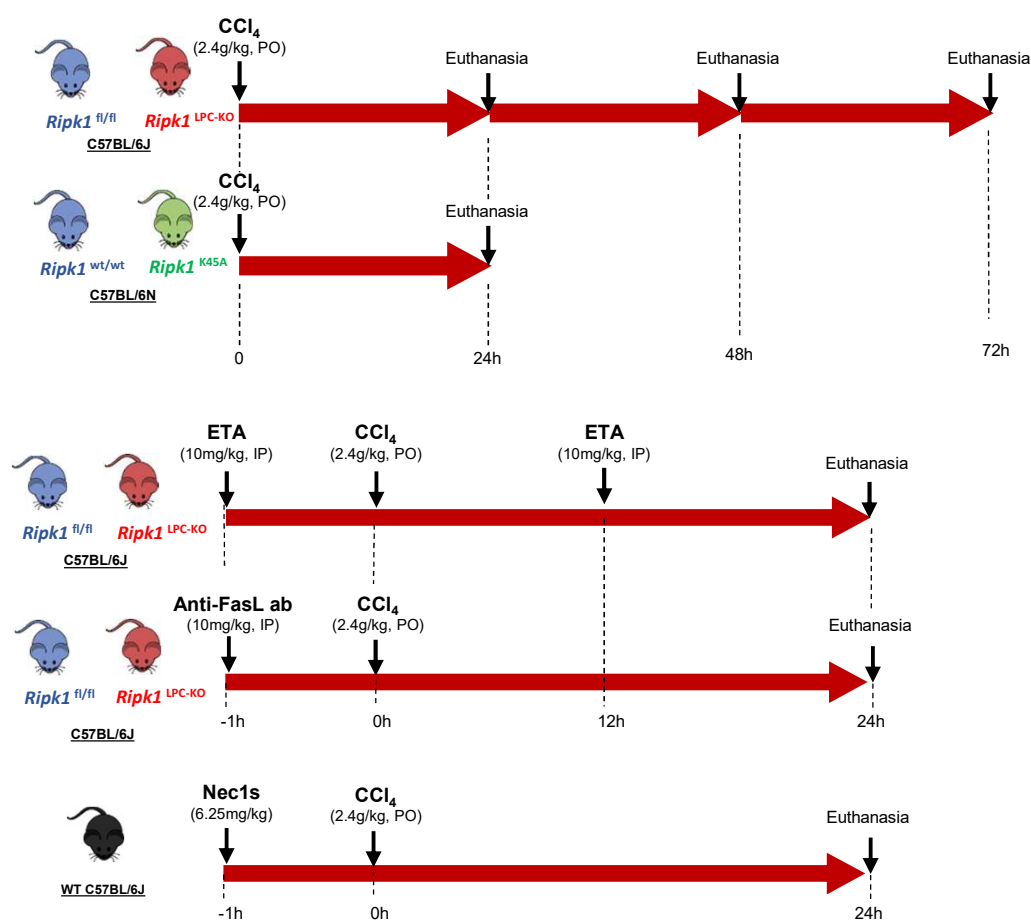

LPC : Liver parenchymal cells

K45A : Kinase Dead (KD)

**Figure S3: Experimental design.** *Ripk1*<sup>LPC-KO</sup> (red; LPC-KO, Liver Parenchymal Cell – Knock Out) and *Ripk1*<sup>K45A</sup> (green; Kinase Dead, KD) C57BL/6 mice along with their respective WT littermates (blue; *Ripk1*<sup>fl/fl</sup> [fl, floxed] and *Ripk1*<sup>wt/wt</sup> [wt, wild-type]) were force-fed with olive oil alone (non-treated, NT) or containing CCl<sub>4</sub> with a final administered dose of 2.4g/kg (PO, Per Os). When used, etanercept (ETA) or anti-FasL antibody (ab) or vehicle (PBS) were intraperitoneally (IP) injected at 10 mg/kg, 1 hour before CCl<sub>4</sub> treatment, and 12 hour later for a second dose of ETA. In another experiment, Nec-1s or vehicle (PBS-DMSO 6%) was intravenously injected at 6.25 mg/kg 1 hour before CCl<sub>4</sub> treatment. Analysis were conducted 12, 24, 48 or 72 hours post CCl<sub>4</sub> administration as shown in the diagram.

**Figure S4**

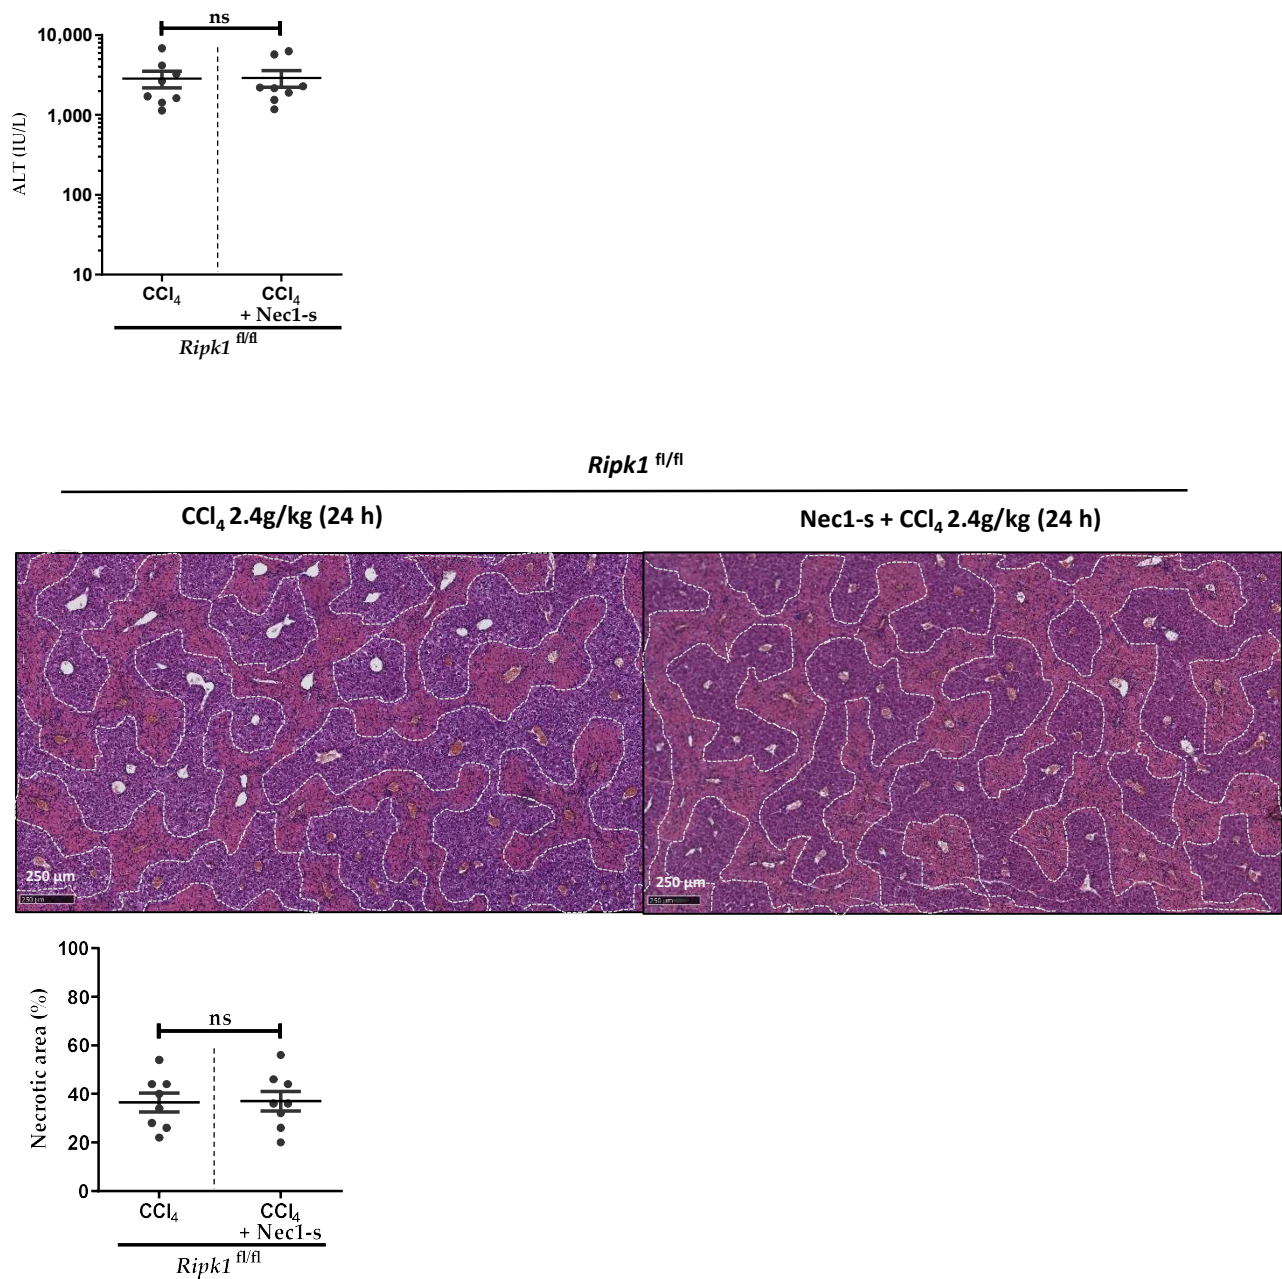

**Figure S4: No contribution of RIPK1 kinase activity during CCl<sub>4</sub>-induced hepatotoxicity.** C57BL/6J *Ripk1*<sup>fl/fl</sup> mice were forced with olive oil containing CCl<sub>4</sub> (dose of 2.4 g/kg body weight), 24 hours before sample collection. Levels of serum alanine aminotransferase (ALT). Representative pictures of liver tissue sections stained by H&E with necrotic area quantifications. For all graphs, each dot represents an individual and errors bars are expressed as means ± SEM (ns, non-significant).

**Table S1**

| Mouse Gene                  | Forward                      | Reverse                      |
|-----------------------------|------------------------------|------------------------------|
| 18S                         | 5'-CGCCGCTAGAGGTGAAATTC-3'   | 5'-TTGGCAAATGCTTTCGCTC-3'    |
| <i>Hmox-1</i>               | 5'-AGGTACACATCCAAGCCGAGA-3'  | 5'-CATCACCAGCTTAAAGCCTTCT-3' |
| <i>Nfe2l2</i> (Nrf-2)       | 5'-TAGATGACCATGAGTCGCTTGC-3' | 5'-GCCAAACTTGCTCCATGTCC-3'   |
| <i>Cybb</i> (Nox-2)         | 5'-AGTGCGTGTGCTCGACAA-3'     | 5'-GCGGTGTGCAGTGCTATCAT-3'   |
| <i>Nqo1</i>                 | 5'-AGGATGGGAGGTACTCGAATC-3'  | 5'-AGGCGTCCTTCCTTATATGCTA-3' |
| <i>Il-6</i>                 | 5'-CGATGATGCACTTGCAGA-3'     | 5'-CTCTGAAGGACTCTGGCTTTG-3'  |
| <i>Ifn-γ</i>                | 5'-AAGACAATCAGGCCATCAGC-3'   | 5'-CAGCAGCGACTCCTTTTCC-3'    |
| <i>Il-1b</i>                | 5'-GCCACCTTTTGACAGTGATGAG-3' | 5'-GACAGCCCAGGTCAAAGGTT-3'   |
| <i>Ccl2</i>                 | 5'-TCCCAATGAGTAGGCTGGAG-3'   | 5'-TCTGGACCCATTCTTCTTG-3'    |
| <i>Rela</i> (NFKBp65)       | 5'-GACCCCTGTCCTCTCACATCCG-3' | 5'-CAGCTCCCAGAGTCCGGTT-3'    |
| <i>Nfkbia</i> (IκBα)        | 5'-TGAAGGACGAGGAGTACGAGC-3'  | 5'-TTCGTGGATGATTGCCAAGTG-3'  |
| <i>Tnfaip3</i> (A20)        | 5'-TGCCCAGTCTGTAGTCTTCG-3'   | 5'-AGTTGTTCAAGCATGGTCCT-3'   |
| <i>Cflar</i> (cFLIP)        | 5'-GAGGCCAGCTCTCTTTTGCT-3'   | 5'-TCCACGGTTGCTTTGTCTGT-3'   |
| <i>Ikkb-γ</i> (Nemo)        | 5'-GGTGGAGAGACTGAGCTTGG-3'   | 5'-CCTCTAAAGCTTGCCGATCC-3'   |
| <i>Saa1</i>                 | 5'-TGTTACGAGGCTTTCCAAG-3'    | 5'-GTCCTCTGCCGAAGAATTCC-3'   |
| <i>Cxcl1</i>                | 5'-CGCCTATCGCCAATGAGC-3'     | 5'-GAACCAAGGGAGCTTCAGG-3'    |
| <i>Ccl20</i>                | 5'-TCTGCTCTTCCTTGCTTTGG-3'   | 5'-TCACCCAGTTCTGCTTTG-3'     |
| <i>Tnf-α</i>                | 5'-TAGCTCCCAGAAAAGCAAGC-3'   | 5'-TTTTCTGGAGGGAGATGTGG-3'   |
| <i>Tnfrsf1a</i> (TNFR1)     | 5'-ATCGAGAGGCTGGAGATGC-3'    | 5'-GGCGGGATTCTCAGAGC-3'      |
| <i>Tnfrsf1b</i> (TNFR2)     | 5'-CGCTGGTCTTCGAACTGC-3'     | 5'-CAGGAGGACACTTAGCACAGC-3'  |
| <i>Fas</i>                  | 5'-CTCCGAGTTTAAAGCTGAGG-3'   | 5'-TGTAATCCTTCCCTTCTGTGC-3'  |
| <i>FasL</i>                 | 5'-GCAGCAGCCCATGAATTACC-3'   | 5'-GGTAATTCATGGGCTGCTGC-3'   |
| <i>Tnfsf10</i> (TRAIL)      | 5'-TGAGAACCTTTCAGGACACC-3'   | 5'-GGCCTAAGGTCTTCCATCC-3'    |
| <i>Tnfrsf10b</i> (TRAIL-R2) | 5'-CCGGGCAGATCACTACACC-3'    | 5'-AGACAGGGTCCTCTTGATGG-3'   |

**Table S1: Primer sequences**
